# Supplementary material for: Continuity of Physicians’ Dedication to Inpatient Hospice and Palliative Care: A 14-year Nationwide Survey in Taiwan
Source: MDPI journal article supplement (doi:10.3390/ijerph16162932), 2019-08-15
Supplement: s1 [file s1]

**Table S1.** The turnover rate of HPM physicians in Taiwan from 2000 to 2013.

| Year | No. of physicians in the year | No. of new physicians in the year | No. of physicians left in the year | Turnover rate of physicians left in the year <sup>1</sup> | Ratio of new physicians in the year <sup>1</sup> |
|------|-------------------------------|-----------------------------------|------------------------------------|-----------------------------------------------------------|--------------------------------------------------|
| 2000 | 77                            | 77                                | -                                  | -                                                         | -                                                |
| 2001 | 107                           | 48                                | 18                                 | 19.6%                                                     | 52.2%                                            |
| 2002 | 116                           | 44                                | 35                                 | 31.4%                                                     | 39.5%                                            |
| 2003 | 120                           | 38                                | 34                                 | 28.8%                                                     | 32.2%                                            |
| 2004 | 129                           | 33                                | 24                                 | 19.3%                                                     | 26.5%                                            |
| 2005 | 127                           | 37                                | 39                                 | 30.5%                                                     | 28.9%                                            |
| 2006 | 139                           | 32                                | 20                                 | 15.0%                                                     | 24.1%                                            |
| 2007 | 158                           | 44                                | 25                                 | 16.8%                                                     | 29.6%                                            |
| 2008 | 151                           | 30                                | 37                                 | 23.9%                                                     | 19.4%                                            |
| 2009 | 165                           | 39                                | 25                                 | 15.8%                                                     | 24.7%                                            |
| 2010 | 199                           | 52                                | 18                                 | 9.9%                                                      | 28.6%                                            |
| 2011 | 213                           | 53                                | 39                                 | 18.9%                                                     | 25.7%                                            |
| 2012 | 200                           | 32                                | 45                                 | 21.8%                                                     | 15.5%                                            |
| 2013 | 217                           | 45                                | 28                                 | 13.4%                                                     | 21.6%                                            |

<sup>1</sup>Reference: Aksu, A. Employee turnover: Calculation of turnover. In Handbook of hospitality human resources management, 2008; p 195.
